# Supplementary material for: Does source credibility matter for point-of-decision prompts? A quasi-experimental field study to increase stair use
Source: PLOS journal article supplement (doi:10.1371/journal.pone.0225520), 2019-11-21
Supplement: S1 (10.1371/journal.pone.0225520.s001) [file journal.pone.0225520.s001]

## S1 Appendix. The questions in the pretest

【Climbing one step of stairs extends your lifespan by 4 seconds】

【每爬樓梯一級，你的壽命可延長 4 秒】

This message is reported by:

**New English Journal of Medicine**

(新英格蘭醫學期刊)

**I think this source is / I think:**

|                       | 1                     | 2                     | 3                     | 4                     | 5                     | 6                     | 7                     |                                          |
|-----------------------|-----------------------|-----------------------|-----------------------|-----------------------|-----------------------|-----------------------|-----------------------|------------------------------------------|
| Little Known          | <input type="radio"/> | <input type="radio"/> | <input type="radio"/> | <input type="radio"/> | <input type="radio"/> | <input type="radio"/> | <input type="radio"/> | Well known                               |
| Untrustworthy         | <input type="radio"/> | <input type="radio"/> | <input type="radio"/> | <input type="radio"/> | <input type="radio"/> | <input type="radio"/> | <input type="radio"/> | Trustworthy                              |
| Unauthoritative       | <input type="radio"/> | <input type="radio"/> | <input type="radio"/> | <input type="radio"/> | <input type="radio"/> | <input type="radio"/> | <input type="radio"/> | Authoritative                            |
| Unqualified           | <input type="radio"/> | <input type="radio"/> | <input type="radio"/> | <input type="radio"/> | <input type="radio"/> | <input type="radio"/> | <input type="radio"/> | Qualified                                |
| Biased                | <input type="radio"/> | <input type="radio"/> | <input type="radio"/> | <input type="radio"/> | <input type="radio"/> | <input type="radio"/> | <input type="radio"/> | Unbiased                                 |
| Inaccurate            | <input type="radio"/> | <input type="radio"/> | <input type="radio"/> | <input type="radio"/> | <input type="radio"/> | <input type="radio"/> | <input type="radio"/> | Accurate                                 |
| I would not accept    | <input type="radio"/> | <input type="radio"/> | <input type="radio"/> | <input type="radio"/> | <input type="radio"/> | <input type="radio"/> | <input type="radio"/> | I would accept what it says              |
| I would not recommend | <input type="radio"/> | <input type="radio"/> | <input type="radio"/> | <input type="radio"/> | <input type="radio"/> | <input type="radio"/> | <input type="radio"/> | I would recommend what it says to others |

【Climbing one step of stairs extends your lifespan by 4 seconds】

【每爬樓梯一級，你的壽命可延長 4 秒】

This message is presented by:

**Person's Image  
(Doctor/Student)**

**I think this person is:**

|               | 1                     | 2                     | 3                     | 4                     | 5                     | 6                     | 7                     |             |
|---------------|-----------------------|-----------------------|-----------------------|-----------------------|-----------------------|-----------------------|-----------------------|-------------|
| Unqualified   | <input type="radio"/> | <input type="radio"/> | <input type="radio"/> | <input type="radio"/> | <input type="radio"/> | <input type="radio"/> | <input type="radio"/> | Qualified   |
| Unreliable    | <input type="radio"/> | <input type="radio"/> | <input type="radio"/> | <input type="radio"/> | <input type="radio"/> | <input type="radio"/> | <input type="radio"/> | Reliable    |
| Unsympathetic | <input type="radio"/> | <input type="radio"/> | <input type="radio"/> | <input type="radio"/> | <input type="radio"/> | <input type="radio"/> | <input type="radio"/> | Caring      |
| Inexperienced | <input type="radio"/> | <input type="radio"/> | <input type="radio"/> | <input type="radio"/> | <input type="radio"/> | <input type="radio"/> | <input type="radio"/> | Experienced |
| Insincere     | <input type="radio"/> | <input type="radio"/> | <input type="radio"/> | <input type="radio"/> | <input type="radio"/> | <input type="radio"/> | <input type="radio"/> | Sincere     |
| Unattractive  | <input type="radio"/> | <input type="radio"/> | <input type="radio"/> | <input type="radio"/> | <input type="radio"/> | <input type="radio"/> | <input type="radio"/> | Attractive  |
| Not an Expert | <input type="radio"/> | <input type="radio"/> | <input type="radio"/> | <input type="radio"/> | <input type="radio"/> | <input type="radio"/> | <input type="radio"/> | An Expert   |
| Untrustworthy | <input type="radio"/> | <input type="radio"/> | <input type="radio"/> | <input type="radio"/> | <input type="radio"/> | <input type="radio"/> | <input type="radio"/> | Trustworthy |

*Note:* Some subjects were randomly assigned to read the message from *Facebook* instead of *NEJM*. Likewise, some subjects were randomly assigned to evaluate either the image of the doctor or the student.
